# Supplementary material for: Distribution and phylogeography of the genus Mattirolomyces with a focus on the Asian M. terfezioides haplotypes
Source: PeerJ. 2022 Jul 26;10:e13511. doi: 10.7717/peerj.13511 (PMC9336612; doi:10.7717/peerj.13511)
Supplement: Supplemental Information 7 [file peerj-10-13511-s007.xlsx]

## Sheet: Average monthly temperature
Average montly temperature (°C)
Location/month	Jan	Feb	Mar	Apr	May	Jun	Jul	Aug	Sep	Oct	Nov	Dec	Source:
Wanzhou_District - China	8	8.5	11.6	16.8	21.2	25	28.8	28.9	25.6	20.7	15.8	10.7	https://en.climate-data.org/asia/china/zhejiang/wenzhou-2632/
Beijing - China	-4	-1.4	5.4	13.5	19.9	24.3	26.3	24.9	19.9	13.1	4.7	-1.8	https://en.climate-data.org/asia/china/beijing/beijing-134/
Ravenna - Italy	2.9	5.1	8.6	12.5	16.7	20.7	23.1	22.9	19.6	14.6	8.9	4.3	https://en.climate-data.org/europe/italy/emilia-romagna/ravenna-1174/
Szeget (for Kunfehértó) - Hungary	-1.4	1.4	6.1	11.2	16.2	19.4	20.8	20.5	16.9	11.6	5.4	1	https://en.climate-data.org/europe/hungary/szeged/szeged-648/
Godollo (for Őrbottyán, Mogyoród, Sülysáp) - Hungary	-1.6	1.1	5.6	11.1	15.9	19	20.8	20.2	16.4	11	4.8	0.4	https://www.yr.no/place/Hungary/Pest/G%C3%B6d%C3%B6ll%C5%91-Palotakert_Vas%C3%BAt%C3%A1llom%C3%A1s/statistics.html
Budapest (for Gyál) - Hungary	-0.9	1.8	6.2	11.6	16.3	19.4	21.2	20.8	17.1	11.5	5.4	1.2	https://en.climate-data.org/europe/hungary/budapest/budapest-1218/
Le Thor - France	5	6.3	9.4	12.4	16.3	19.9	22.6	21.8	18.9	14.2	9.2	5.6	https://en.climate-data.org/europe/france/provence-alpes-cote-d-azur/le-thor-66796/
Cheonan (for Buk-myeon, Taean-gun) - Korea	-3.4	-0.9	4.7	11.4	17	21.8	25.2	25.6	20.3	13.3	6.3	-0.2	https://en.climate-data.org/asia/south-korea/chungcheongnam-do/cheonan-4427/
Taiyuan, Shanxi Province - China	-6.4	-2.7	4.3	11.8	18.3	22.4	24.8	22.8	17.4	10.5	2.5	-4.2	https://en.climate-data.org/asia/china/shanxi/taiyuan-2556/
Baotou, Inner Mongolia - China	-11.8	-8.8	-0.1	7.6	15.5	20.8	22.7	20.6	14.5	7.7	-2	-10	see methodology

## Sheet: Average monthly precipitation
Average montly precipitation (mm)
Location/month	Jan	Feb	Mar	Apr	May	Jun	Jul	Aug	Sep	Oct	Nov	Dec	Source:
Wanzhou_District - China	52	86	131	152	200	250	189	252	215	87	60	43	https://en.climate-data.org/asia/china/zhejiang/wenzhou-2632/
Beijing - China	4	5	9	21	32	75	195	192	51	16	7	3	https://en.climate-data.org/asia/china/beijing/beijing-134/
Ravenna - Italy	45	41	54	51	51	47	51	56	64	58	75	53	https://en.climate-data.org/europe/italy/emilia-romagna/ravenna-1174/
Szeget (for Kunfehértó) - Hungary	30	28	29	42	56	71	53	53	37	32	45	42	https://en.climate-data.org/europe/hungary/szeged/szeged-648/
Godollo (for Őrbottyán, Mogyoród, Sülysáp) - Hungary	38.5	36.7	37.4	47.2	64.5	69.8	50.4	49.5	42.7	46.9	59.9	49.3	https://www.yr.no/place/Hungary/Pest/G%C3%B6d%C3%B6ll%C5%91-Palotakert_Vas%C3%BAt%C3%A1llom%C3%A1s/statistics.html
Budapest (for Gyál) - Hungary	37	34	32	42	60	69	53	53	41	40	57	46	https://en.climate-data.org/europe/hungary/budapest/budapest-1218/
Le Thor - France	50	60	56	50	54	44	24	44	77	91	70	60	https://en.climate-data.org/europe/france/provence-alpes-cote-d-azur/le-thor-66796/
Cheonan (for Buk-myeon, Taean-gun) - Korea	25	30	53	91	84	135	297	241	144	49	50	30	https://en.climate-data.org/asia/south-korea/chungcheongnam-do/cheonan-4427/
Taiyuan, Shanxi Province - China	4	5	11	19	30	45	108	102	53	21	11	4	https://en.climate-data.org/asia/china/shanxi/taiyuan-2556/
Baotou, Inner Mongolia - China	2	3	6	15	22	30	79	86	36	20	4	1	see methodology
